# Supplementary material
Source: publisher figshare collection journal article supplement (https://frontiersin.figshare.com/ndownloader/files/14670521)
Supplement: Supplementary file 1 [file 14670521]

# Minimum Spectral Bandwidth in Echo Seeded Free Electron Lasers: Supplementary Material

Erik Hemsing

SLAC National Accelerator Laboratory, Menlo Park, California 94025, USA

## SUPPLEMENTARY INFORMATION

### Second Moment Calculation with Super Gaussian

The integral for a super-Gaussian is,

$$\int z^n e^{-\alpha z^4} dz = \frac{Y_n \Gamma(\frac{1}{4})}{2\alpha^{\frac{n+1}{4}}}. \quad (1)$$

where

$$Y_n = \frac{(1 + (-1)^n)}{2\Gamma(\frac{1}{4})} \Gamma\left(\frac{n+1}{4}\right). \quad (2)$$

Brackets are defined to be shorthand for the normalized expression,

$$\langle z^n \rangle = \frac{\int z^n e^{-\alpha z^4} dz}{\int e^{-\alpha z^4} dz} = \frac{Y_n}{\alpha^{\frac{n}{4}}}. \quad (3)$$

Consider a parameter that can be written as an expansion of the form

$$X(z) = \sum_{N=1}^{\infty} c_N z^N. \quad (4)$$

With these definitions, the second moment of the parameter  $X(x)$  is then given by

$$\begin{aligned} \sigma_X^2 &= \langle X^2 \rangle - \langle X \rangle^2 \\ &= \sum_{N,M=1}^{\infty} c_N c_M [\langle z^{N+M} \rangle - \langle z^N \rangle \langle z^M \rangle] \\ &= \sum_{N,M=1}^{\infty} c_N c_M \frac{Y_{N+M} - Y_N Y_M}{\alpha^{\frac{N+M}{4}}}. \end{aligned} \quad (5)$$

Both (3) and (5) are useful for computing several terms. For instance, the rms length  $\sigma_z$  of the super-Gaussian electron beam is found directly from (3) for  $n = 2$ , with the direct substitution  $\alpha = q^2/\sigma_z^4$  where,

$$q = \frac{\Gamma(3/4)}{\Gamma(1/4)} \approx \frac{1}{3}. \quad (6)$$

Similarly, the transform-limited bunching bandwidth  $\sigma_{k_E}$  can be found by combining expressions and setting  $\alpha = 2q^2(1/\sigma_z^4 + 1/2\sigma_g^4)$ ,

$$\sigma_{k_E}^2 = 3q^2 \sqrt{\frac{2}{\sigma_z^4} + \frac{1}{\sigma_g^4}} \approx \frac{1}{2} \sqrt{\frac{1}{\sigma_z^4} + \frac{1}{2\sigma_g^4}}. \quad (7)$$

The rms width of the bunching envelope is,

$$\sigma_b^2 = \frac{1}{\sqrt{\frac{2}{\sigma_z^4} + \frac{1}{\sigma_g^4}}} = \frac{3q^2}{\sigma_{k_E}^2} \approx \frac{1}{3\sigma_{k_E}^2}. \quad (8)$$

Comparing the series expansion for the phase

$$\varphi(z) = \sum_{N=1}^{\infty} \frac{\phi_N}{N!} z^N, \quad (9)$$

with  $X$  above, we see that to calculate  $\sigma_{\varphi'}^2$  in the main text we identify  $c_N = \phi_N/\Gamma(N)$  to obtain

$$\sigma_{\varphi'}^2 = \sum_{N,M=1}^{\infty} G_{N,M} \frac{\phi_N \phi_M}{(\sigma_{k_E})^{N+M-2}} \quad (10)$$

where

$$G_{N,M} = \frac{Y_{N+M-2} - Y_{N-1} Y_{M-1}}{\Gamma(N)\Gamma(M)} (3q)^{\frac{N+M-2}{2}}. \quad (11)$$

Note that  $3q = 1.013\dots$ , so for small  $N$  this term can be neglected.

If the phase is described by only a single term in the polynomial expansion, i.e.,

$$\varphi(z) = \frac{\phi_N}{N!} z^N, \quad (12)$$

then the excess bandwidth is given by

$$\sigma_{\varphi'}^2 = \frac{G_N \phi_N^2}{(\sigma_{k_E}^2)^{N-1}} \quad (13)$$

where  $G_N = G_{N,N}$ ,

$$G_N = \frac{Y_{2N-2} - Y_{N-1}^2}{\Gamma(N)^2} (3q)^{N-1}. \quad (14)$$

The first few numerical values are given in the table in the main text.

The total bandwidth is then

$$\sigma_k^2 = \sigma_{k_E}^2 + \frac{G_N \phi_N^2}{(\sigma_{k_E}^2)^{N-1}}. \quad (15)$$

### Optimum Laser and Electron Beam for Minimum Bandwidth

The minimum total bandwidth is given when the transform-limited bandwidth satisfies,

$$(\sigma_{k_E}^{2N})_{min} = \phi_N^2 G_N (N-1). \quad (16)$$

If the electron beam has a fixed-length and the transform-limited laser pulse length is varied, the optimal laser pulse that minimizes the bandwidth is given by

$$(\sigma_L^4)_{min} = \frac{m^{4/3} \sigma_z^4}{8 [(\phi_N \sigma_z^N)^2 G_N(N-1)]^{2/N} - 2} \quad (17)$$

Clearly, physical solutions exist only for sufficiently large amplitudes of the nonlinear coefficient,

$$\phi_N^2 G_N(N-1) > \sigma_{k_E}^{2N} (\sigma_L \rightarrow \infty) = 1/\sigma_z^{2N} 2^N \quad (18)$$

otherwise, the smallest obtainable bunching bandwidth

is the  $\sigma_L \rightarrow \infty$  limit.

Alternatively, if the laser is held fixed and the electron beam length is adjusted, the optimal length is

$$(\sigma_z^4)_{min} = \frac{2\sigma_L^4}{8 [(\phi_N \sigma_L^N)^2 G_N(N-1)]^{2/N} - m^{4/3}}. \quad (19)$$

Again, physical solutions only exist if,

$$\phi_N^2 G_N(N-1) > \sigma_{k_E}^{2N} (\sigma_z \rightarrow \infty) = m^{2N/3} / \sigma_L^{2N} \sqrt{8^N}. \quad (20)$$

Otherwise, the smallest obtainable bunching bandwidth is the  $\sigma_z \rightarrow \infty$  limit.
